# Supplementary material for: Molecular diversity and genetic structure of Saccharum complex accessions
Source: PubMed Central journal article supplement (PMC7244124; doi:10.1371/journal.pone.0233211), 2020-05-22
Supplement: pone.0233211.s008.pdf [file pone.0233211.s008.pdf]

|                                                                                                                                                                                                                                                                                                                                                                                                                                                                                              |                                                                                                                                                                                                                                                                                                                                                                                                                                                                                                                                                                                                                                                                                                                                                                                                                                                                                                                                                                                                                                                                                                                                                                                                                                                                                                                                                                                                                                                                                       |
|----------------------------------------------------------------------------------------------------------------------------------------------------------------------------------------------------------------------------------------------------------------------------------------------------------------------------------------------------------------------------------------------------------------------------------------------------------------------------------------------|---------------------------------------------------------------------------------------------------------------------------------------------------------------------------------------------------------------------------------------------------------------------------------------------------------------------------------------------------------------------------------------------------------------------------------------------------------------------------------------------------------------------------------------------------------------------------------------------------------------------------------------------------------------------------------------------------------------------------------------------------------------------------------------------------------------------------------------------------------------------------------------------------------------------------------------------------------------------------------------------------------------------------------------------------------------------------------------------------------------------------------------------------------------------------------------------------------------------------------------------------------------------------------------------------------------------------------------------------------------------------------------------------------------------------------------------------------------------------------------|
| <b>Manuscript Number:</b>                                                                                                                                                                                                                                                                                                                                                                                                                                                                    | PONE-D-20-08692                                                                                                                                                                                                                                                                                                                                                                                                                                                                                                                                                                                                                                                                                                                                                                                                                                                                                                                                                                                                                                                                                                                                                                                                                                                                                                                                                                                                                                                                       |
| <b>Article Type:</b>                                                                                                                                                                                                                                                                                                                                                                                                                                                                         | Research Article                                                                                                                                                                                                                                                                                                                                                                                                                                                                                                                                                                                                                                                                                                                                                                                                                                                                                                                                                                                                                                                                                                                                                                                                                                                                                                                                                                                                                                                                      |
| <b>Full Title:</b>                                                                                                                                                                                                                                                                                                                                                                                                                                                                           | Molecular diversity and genetic structure of Saccharum complex accessions                                                                                                                                                                                                                                                                                                                                                                                                                                                                                                                                                                                                                                                                                                                                                                                                                                                                                                                                                                                                                                                                                                                                                                                                                                                                                                                                                                                                             |
| <b>Short Title:</b>                                                                                                                                                                                                                                                                                                                                                                                                                                                                          | Molecular diversity of Saccharum accessions                                                                                                                                                                                                                                                                                                                                                                                                                                                                                                                                                                                                                                                                                                                                                                                                                                                                                                                                                                                                                                                                                                                                                                                                                                                                                                                                                                                                                                           |
| <b>Corresponding Author:</b>                                                                                                                                                                                                                                                                                                                                                                                                                                                                 | Monalisa Sampaio Carneiro, Ph. D.<br>Universidade Federal de São Carlos Centro de Ciências Agrárias<br>Araras,, SP BRAZIL                                                                                                                                                                                                                                                                                                                                                                                                                                                                                                                                                                                                                                                                                                                                                                                                                                                                                                                                                                                                                                                                                                                                                                                                                                                                                                                                                             |
| <b>Keywords:</b>                                                                                                                                                                                                                                                                                                                                                                                                                                                                             |                                                                                                                                                                                                                                                                                                                                                                                                                                                                                                                                                                                                                                                                                                                                                                                                                                                                                                                                                                                                                                                                                                                                                                                                                                                                                                                                                                                                                                                                                       |
| <b>Abstract:</b>                                                                                                                                                                                                                                                                                                                                                                                                                                                                             | Sugarcane is an important crop for food and energy security, providing sucrose and bioethanol from sugar content and bioelectricity from lignocellulosic waste. In order to evaluate the diversity and genetic structure of the Brazilian Panel of Sugarcane Genotypes, a core collection composed by 254 accessions of the Saccharum complex, eight TRAP markers anchored in sucrose and lignin metabolism genes were evaluated. A total of 584 polymorphic fragments were identified and used to investigate the genetic structure of BPSG through analysis of molecular variance (AMOVA), principal components analysis (PCA), a Bayesian method using STRUCTURE software, genetic dissimilarity and phylogenetic tree. AMOVA showed a moderate genetic differentiation between ancestors and improved accessions and the molecular variance was higher within populations than among populations. The PCA approach suggests clustering in according with evolutionary and breeding sugarcane history, which was confirmed by STRUCTURE analysis and phylogenetic tree. The Bayesian method was able to separate ancestors of the improved accessions while the phylogenetic tree showed clusters considering the family relatedness within three major clades; the first being composed mainly by ancestors and the other two mainly by improved accessions. This work can contribute to better management of the crosses considering functional regions of the sugarcane genome. |
| <b>Order of Authors:</b>                                                                                                                                                                                                                                                                                                                                                                                                                                                                     | Carolina Medeiros<br>Thiago Willian Almeida Balsalobre<br>Monalisa Sampaio Carneiro, Ph. D.                                                                                                                                                                                                                                                                                                                                                                                                                                                                                                                                                                                                                                                                                                                                                                                                                                                                                                                                                                                                                                                                                                                                                                                                                                                                                                                                                                                           |
| <b>Additional Information:</b>                                                                                                                                                                                                                                                                                                                                                                                                                                                               |                                                                                                                                                                                                                                                                                                                                                                                                                                                                                                                                                                                                                                                                                                                                                                                                                                                                                                                                                                                                                                                                                                                                                                                                                                                                                                                                                                                                                                                                                       |
| <b>Question</b>                                                                                                                                                                                                                                                                                                                                                                                                                                                                              | <b>Response</b>                                                                                                                                                                                                                                                                                                                                                                                                                                                                                                                                                                                                                                                                                                                                                                                                                                                                                                                                                                                                                                                                                                                                                                                                                                                                                                                                                                                                                                                                       |
| <b>Financial Disclosure</b><br><br>Enter a financial disclosure statement that describes the sources of funding for the work included in this submission. Review the <a href="#">submission guidelines</a> for detailed requirements. View published research articles from <a href="#">PLOS ONE</a> for specific examples.<br><br>This statement is required for submission and <b>will appear in the published article</b> if the submission is accepted. Please make sure it is accurate. | This work was supported by grants from the FINEP (Financiadora de Estudos e Projetos), FAPESP (Fundação de Amparo à Pesquisa de São Paulo, 08/57908-6) and CNPq, Conselho Nacional de Desenvolvimento Científico e Tecnológico, 574002/2008-1). CM received a master's fellowship from CAPES (Coordenação de Aperfeiçoamento de Pessoal de Nível Superior – Finance Code 001).                                                                                                                                                                                                                                                                                                                                                                                                                                                                                                                                                                                                                                                                                                                                                                                                                                                                                                                                                                                                                                                                                                        |

**Unfunded studies**

Enter: *The author(s) received no specific funding for this work.*

**Funded studies**

Enter a statement with the following details:

- Initials of the authors who received each award
- Grant numbers awarded to each author
- The full name of each funder
- URL of each funder website
- Did the sponsors or funders play any role in the study design, data collection and analysis, decision to publish, or preparation of the manuscript?
- **NO** - Include this sentence at the end of your statement: *The funders had no role in study design, data collection and analysis, decision to publish, or preparation of the manuscript.*
- **YES** - Specify the role(s) played.

\* typeset

**Competing Interests**

Use the instructions below to enter a competing interest statement for this submission. On behalf of all authors, disclose any [competing interests](#) that could be perceived to bias this work—acknowledging all financial support and any other relevant financial or non-financial competing interests.

This statement **will appear in the published article** if the submission is accepted. Please make sure it is accurate. View published research articles from [PLOS ONE](#) for specific examples.

The authors have declared that no competing interests exist.

**NO authors have competing interests**

Enter: *The authors have declared that no competing interests exist.*

**Authors with competing interests**

Enter competing interest details beginning with this statement:

*I have read the journal's policy and the authors of this manuscript have the following competing interests: [insert competing interests here]*

\* typeset

**Ethics Statement**

N/A

Enter an ethics statement for this submission. This statement is required if the study involved:

- Human participants
- Human specimens or tissue
- Vertebrate animals or cephalopods
- Vertebrate embryos or tissues
- Field research

Write "N/A" if the submission does not require an ethics statement.

General guidance is provided below. Consult the [submission guidelines](#) for detailed instructions. **Make sure that all information entered here is included in the Methods section of the manuscript.**

**Format for specific study types**

**Human Subject Research (involving human participants and/or tissue)**

- Give the name of the institutional review board or ethics committee that approved the study
- Include the approval number and/or a statement indicating approval of this research
- Indicate the form of consent obtained (written/oral) or the reason that consent was not obtained (e.g. the data were analyzed anonymously)

**Animal Research (involving vertebrate animals, embryos or tissues)**

- Provide the name of the Institutional Animal Care and Use Committee (IACUC) or other relevant ethics board that reviewed the study protocol, and indicate whether they approved this research or granted a formal waiver of ethical approval
- Include an approval number if one was obtained
- If the study involved *non-human primates*, add *additional details* about animal welfare and steps taken to ameliorate suffering
- If anesthesia, euthanasia, or any kind of animal sacrifice is part of the study, include briefly which substances and/or methods were applied

**Field Research**

Include the following details if this study involves the collection of plant, animal, or other materials from a natural setting:

- Field permit number
- Name of the institution or relevant body that granted permission

**Data Availability**

Authors are required to make all data underlying the findings described fully available, without restriction, and from the time of publication. PLOS allows rare exceptions to address legal and ethical concerns. See the [PLOS Data Policy](#) and [FAQ](#) for detailed information.

Yes - all data are fully available without restriction

A Data Availability Statement describing where the data can be found is required at submission. Your answers to this question constitute the Data Availability Statement and **will be published in the article**, if accepted.

**Important:** Stating 'data available on request from the author' is not sufficient. If your data are only available upon request, select 'No' for the first question and explain your exceptional situation in the text box.

Do the authors confirm that all data underlying the findings described in their manuscript are fully available without restriction?

**Describe where the data may be found in full sentences. If you are copying our sample text, replace any instances of XXX with the appropriate details.**

- If the data are **held or will be held in a public repository**, include URLs, accession numbers or DOIs. If this information will only be available after acceptance, indicate this by ticking the box below. For example: *All XXX files are available from the XXX database (accession number(s) XXX, XXX).*
- If the data are all contained **within the manuscript and/or Supporting Information files**, enter the following:  
*All relevant data are within the manuscript and its Supporting Information files.*
- If neither of these applies but you are able to provide **details of access elsewhere**, with or without limitations, please do so. For example:

*Data cannot be shared publicly because of [XXX]. Data are available from the XXX Institutional Data Access / Ethics Committee (contact via XXX) for researchers who meet the criteria for access to confidential data.*

*The data underlying the results presented in the study are available from (include the name of the third party*

All relevant data are within the manuscript and its Supporting Information files.

|                                                                                                                                                                                                                                         |                                                                                                                                                                                  |
|-----------------------------------------------------------------------------------------------------------------------------------------------------------------------------------------------------------------------------------------|----------------------------------------------------------------------------------------------------------------------------------------------------------------------------------|
| <p><i>and contact information or URL).</i></p> <ul style="list-style-type: none"><li>• This text is appropriate if the data are owned by a third party and authors do not have permission to share the data.</li></ul> <p>* typeset</p> |                                                                                                                                                                                  |
| Additional data availability information:                                                                                                                                                                                               | Tick here if the URLs/accession numbers/DOIs will be available only after acceptance of the manuscript for publication so that we can ensure their inclusion before publication. |

1           Molecular diversity and genetic structure of *Saccharum* complex accessions

2

3   **Short title:** Molecular diversity of *Saccharum* accessions

4

5   Carolina Medeiros<sup>1</sup>, Thiago Willian Almeida Balsalobre<sup>1</sup>, Monalisa Sampaio Carneiro<sup>1</sup>

6

7   <sup>1</sup> Departamento de Biotecnologia e Produção Vegetal e Animal, Centro de Ciências

8   Agrárias, Universidade Federal de São Carlos, Araras, São Paulo, Brasil

9

10   \* Corresponding author

11   E-mail: monalisa@ufscar.br (MSC)

12

## 13 Abstract

14 Sugarcane is an important crop for food and energy security, providing sucrose and  
15 bioethanol from sugar content and bioelectricity from lignocellulosic waste. In order to  
16 evaluate the diversity and genetic structure of the Brazilian Panel of Sugarcane  
17 Genotypes a core collection composed by 254 accessions of the *Saccharum* complex,  
18 eight TRAP markers anchored in sucrose and lignin metabolism genes were evaluated.  
19 A total of 584 polymorphic fragments were identified and used to investigate the  
20 genetic structure of BPSG through analysis of molecular variance (AMOVA), principal  
21 components analysis (PCA), a Bayesian method using STRUCTURE software, genetic  
22 dissimilarity and phylogenetic tree. AMOVA showed a moderate genetic differentiation  
23 between ancestors and improved accessions and the molecular variance was higher  
24 within populations than among populations. The PCA approach suggests clustering in  
25 according with evolutionary and breeding sugarcane history, which was confirmed by  
26 STRUCTURE analysis and phylogenetic tree. The Bayesian method was able to  
27 separate ancestors of the improved accessions while the phylogenetic tree showed  
28 clusters considering the family relatedness within three major clades; the first being  
29 composed mainly by ancestors and the other two mainly by improved accessions. This  
30 work can contribute to better management of the crosses considering functional regions  
31 of the sugarcane genome.

32



## 33 Introduction

34 Sugarcane, a high efficiency photosynthetic grass, is important for economy of  
35 many countries in the tropics and subtropics, playing a central role as a primary sugar-  
36 producing crop and has major potential as a bioenergy crop [1-3]. The modern  
37 sugarcane cultivars originate from the *Saccharum* complex, which gathers two wild  
38 *Saccharum* species (*S. spontaneum* and *S. robustum*), four cultivated species (*S.*  
39 *officinarum*, *S. sinense*, *S. barberi* and *S. edule*) and four related interbreeding genera  
40 (*Erianthus*, *Miscanthus*, *Narenga* and *Sclerostachya*) [4-7]. The *Saccharum* species  
41 present large genome and variation in the number of chromosomes [8-10]. This  
42 complexity was inherited by modern sugarcane cultivars, which present a variable level  
43 of ploidy, frequent aneuploidy, and large genome size around 10 Gb [10-12].

44 The first interspecific hybridizations occurred among *S. officinarum* and *S.*  
45 *spontaneum* species, followed by successive backcrosses with *S. officinarum* aiming to  
46 recover the sucrose genes [4,13]. According to this initial breeding strategy, naturally  
47 few accessions were used at the crosses and approximately 80% of the genome of  
48 current sugarcane cultivars came from *S. officinarum*, 10–15% from *S. spontaneum* and  
49 the remaining 5–10% being recombinant chromosomes [14,15]. Differently of *S.*  
50 *officinarum*, the accessions of *S. spontaneum* present low sugar content, high biomass  
51 production and resistance to some diseases [2,16]. Thus, it is an important genetic  
52 background to increase biomass production and have been used into plant breeding for  
53 energy cane purpose [13,17]. This energy cane with more fiber content and low sugar  
54 production could be an efficient source for second-generation ethanol production  
55 [18,19]. Furthermore, the higher rates of biomass and/or sucrose production can be  
56 obtained through better management of genetic resources present in germplasm banks  
57 and core collections.

58           The pre-breeding strategy to choose parents for crosses is an important step to  
59 increase the probability of obtaining more productive cultivars. Although morphological  
60 and agronomical characterization plays an important role in the classification and  
61 organization of germplasm accessions, errors may occur since vegetative traits are  
62 influenced by environmental effects, showing continuous variation and a high degree of  
63 plasticity, and which many times do not reflect the real genetic diversity of the  
64 *Saccharum* spp. accessions [20]. So, the molecular profile could be used to complement  
65 the morphological characterization and identify in a more reliable way better  
66 combinations between accessions for crosses according to breeding goals [18,21,22].  
67 Molecular markers are useful tools to detect variations directly in the genome and have  
68 been used to investigate the genetic diversity of *Saccharum* spp. accessions [23,24].  
69 However, few studies performed molecular characterization of sugarcane core  
70 collections with functional markers, most of them evaluated non-coding or repeating  
71 regions of the genome and may not be useful about traits of interest to the breeders  
72 [25,26]. Even when functional molecular markers were used, the number of *Saccharum*  
73 spp. accessions evaluated was not more than 181 [27]. Clearly, there is a need to expand  
74 the characterization of larger and more representative *Saccharum* complex collections  
75 with functional markers, bringing together both alleles under bottleneck effect and those  
76 that may be new sources of variation for target traits.

77           TRAP (Target Region Amplification Polymorphism) and EST-SSR (Simple  
78 Sequence Repeats from Expressed Sequence Tag) molecular markers, beside those  
79 identified through genetic mapping, could be used to screening collections into  
80 functional regions of genome [25]. TRAP markers are interesting because they search  
81 for polymorphisms around genes that may be under selection process [28,29].  
82 Furthermore, this approach may indicate accessions for crosses according to molecular

83 profile and, consequently, guide introgression of the new variants for traits of interest  
84 [25,29]. Sucrose and lignin are target traits to sugarcane and energy cane breeding  
85 programs; increase sugar content is one of the main goals of sugarcane breeding  
86 programs around the world [30], while decreasing lignin content may facilitate cellulose  
87 saccharification for second-generation ethanol production from both sugarcane and  
88 energy cane [19,31]. Sucrose and lignin traits have some genes and metabolic pathways  
89 described in the literature [16,21,30-32], so the use of TRAP markers based on these  
90 genes may be a valuable tool to characterize *Saccharum* spp. accessions and research  
91 new allelic variants. Therefore, in this current assignment our objectives were to (i)  
92 characterize a core collection of sugarcane composed by 254 accessions of the  
93 *Saccharum* complex, and (ii) perform diversity and population structure assessments,  
94 using genotyping data obtained through TRAP markers based on the sucrose and lignin  
95 genes. We discuss these results in the context of how functional markers are useful to  
96 report evolutionary and breeding history of sugarcane.

97

## 98 **Materials and methods**

### 99 **Plant material and DNA extraction**

100 In this study, a total of 254 accessions (S1 Table) of the Brazilian Panel of  
101 Sugarcane Genotypes (BPSG) were used. BPSG is a mini core collection from  
102 germplasm bank of the RIDESA (Interuniversity Network for the Development of  
103 Sugarcane Industry) and consisted of 81 ancestors accessions (A) (75 accessions from  
104 *Saccharum* spp. and 06 from *Erianthus* spp.), 137 hybrids from Brazilian breeding  
105 programs (BB) and 36 hybrids from Foreign breeding programs – Foreign Hybrids (FH)  
106 [33]. The BPSG accessions were chosen according to the following criteria: i) relevant  
107 Brazilian cultivars, ii) main parents for Brazilian breeding programs; iii) cultivars from

108 countries that grow sugarcane; iv) parents used in mapping programs [34,35]; and v)  
109 representatives of the species from which the *Saccharum* complex originated. The  
110 genetic variability present into BPSG, for the most part, was a genetic basis for  
111 Brazilian sugarcane breeding programs. The stalks of the accessions were collected and  
112 total genomic DNA was extracted from a fresh meristem cylinder as proposed by Al-  
113 Janabi et al. [36]. DNA concentration was estimated by a Nanodrop One  
114 spectrophotometer (Thermo Scientific, Wilmington, DE, USA) and then the samples  
115 were stored at  $-20^{\circ}\text{C}$  until further use.

116

### 117 **TRAP markers, genotyping and polymorphism analysis**

118 To compose TRAP markers four arbitrary and five fixed primers were used (S2  
119 Table). The arbitrary primers were adapted of Li and Quiros [37], Alwala et al. [21] and  
120 Suman et al. [30]. The three fixed primers associated with sucrose metabolism genes  
121 were based on Alwala et al. [21] (*sucrose synthase* (SuSy), *sucrose phosphate synthase*  
122 (SuPS) and *starch synthase* (StSy)) while two fixed primers associated with lignin  
123 metabolism genes were based on Suman et al. [30] (*caffeic acid O-methyltransferase*  
124 (COMT) and *ferulate-5-hydroxylase* (F5H)). Thus, eight TRAP markers were  
125 performed based on high percentage of polymorphism showed by the reference studies:  
126 StSy + Arbi2, StSy + Arbi3, SuPS + Arbi2, SuPS + Arbi3, SuSy + Arbi1-A, SuSy +  
127 Arbi2 for sucrose metabolism and COMT+Arbi1-S and F5H+Arbi1-S for lignin  
128 metabolism. The PCR were performed on Mastercycler thermocycler (Eppendorf,  
129 Westbury, NY, USA) according to the protocols described by Alwala et al. [21] and  
130 Suman et al. [30] for TRAP markers related with sucrose and lignin metabolisms,  
131 respectively. After PCR, the amplified products were run on 6.5% (w/v) polyacrylamide  
132 denaturing gel for 4.0 h at 65 W and silver staining procedure was employed to detect

133 the fragments as described by Creste et al. [38]. The fragments were scored as “1” for  
134 presence and “0” for absence, in all accessions. Only clearly distinguishable fragments  
135 were scored. For each TRAP marker, the presence of exclusive fragments was  
136 investigated. Through the binary matrix, the PIC (Polymorphism Information Content)  
137 and DP (Discriminatory Power) values were calculated according to Botstein et al. [39]  
138 and Tessier et al. [40], respectively. PIC was used as a tool to measure the information  
139 of a given marker locus for the pool of accessions, while DP was used as a measure of  
140 marker efficiency for the purpose of identification of accession, i.e., the probability that  
141 two randomly chosen individuals have different patterns [41].

142

## 143 **Sequence annotation**

144 The available sequences that gave rise to fixed primers of TRAP markers were  
145 used to annotation (S3 Table). To found homologies the initial sequences from Genbank  
146 were blasted against the NCBI non-redundant database via BLASTX and against the  
147 *Sorghum bicolor* database via the Phytozome website [42]. The metabolic pathways and  
148 biochemical reactions were also verified through the InterMine repository present on the  
149 Phytozome.

150

## 151 **Genetic structure**

152 The genetic structure of BPSG was investigated using different methods: i)  
153 analysis of molecular variance (AMOVA); ii) Principal component analysis (PCA); iii)  
154 a Bayesian model-based method using STRUCTURE software; and iv) genetic  
155 dissimilarity and phylogenetic analysis. AMOVA was performed by the GenAIEx  
156 software [43] to quantify the degree of differentiation and distribution of the genetic  
157 variability between and within of predefined cases: a) ancestors accessions (A group)

158 and accessions from Foreign breeding programs (FH group); b) ancestors accessions (A  
159 group) and accessions from Brazilian breeding programs (BB group); and c)  
160 accessions from Foreign breeding programs (FH group) and accessions from Brazilian  
161 breeding programs (BB group). PCA was performed in the R software [44] through the  
162 FactoMineR [45] and factoextra [46] packages and their respective functions  
163 PCA and fviz\_pca\_ind using raw data from genotyping of TRAP markers. The  
164 analysis with STRUCTURE software [47,48], to verify the number of subpopulations ( $k$ )  
165 and the membership proportion ( $Q$ ), was performed considering the 248 accessions of  
166 the *Saccharum* genus of BPSG, i.e. without accessions of *Erianthus* genus. The  $k$  was  
167 set from 1 to 10 ( $k$ -value), with 10 iterations at a 100,000 burning period and 200,000  
168 Markov Chain Monte Carlo (MCMC) repeats. The STRUCTURE HARVESTER  
169 software was used to find the best values of  $k$  and  $\Delta k$  [49]. Finally, the pair-wise  
170 dissimilarity among the accessions of the *Saccharum* genus was performed in the R  
171 software according to the Jaccard coefficient (Dissimilarity =  $1 - \text{Similarity}$ ) and a  
172 phylogenetic tree was build according to the neighbor-joining (NJ) method with 1,000  
173 bootstrapping through ggtree and ape packages [50, 51]. To verify if the number of  
174 TRAP fragments used to estimate the genetic dissimilarities between accessions was  
175 adequate in terms of accuracy, the bootstrap resample technique [52] was applied as in  
176 Manechini et al. [23]. Briefly, an exponential function was adjusted to estimate the  
177 number of markers needed to assure that the CV associated with the dissimilarity  
178 estimates were lesser or equal to 10%, a threshold considered acceptable in this  
179 research. The median of the coefficient of variation estimates were used to evaluate the  
180 accuracy of the dissimilarity values [53].

181

## 182 **Results**

## 183 **TRAP markers polymorphism and population differentiation**

184 The results regarding the total number of fragments, number of polymorphic  
185 fragments, percentage of polymorphism, PIC and PD values for each of the eight TRAP  
186 markers used in this study are summarized in S4 Table. A total of 595 fragments were  
187 obtained of which 584 were polymorphic. The number of fragments for each TRAP  
188 markers ranged from 44 (SuPS + Arbi2) to 88 (SuSy + Arbi1-A) with an average of  
189 74.37 fragments per locus. The polymorphism percentage was high (> 90%), ranging  
190 from 94.64% (SuPS + Arbi3) to 100% (SuPS + Arbi2, COMT + Arbi1-S and F5H +  
191 Arbi1-S). The averages of PIC and PD values were 0.97 and 0.98, respectively.  
192 Furthermore, PIC ranged from 0.95 (SuPS + Arbi2 and SuPS + Arbi3) to 0.99 (F5H +  
193 Arbi1-S) and DP ranged from 0.95 (F5H + Arbi1-S) to 1.00 (StSy + Arbi3).

194 **Putative exclusive TRAP fragments** were observed for A and BB predefined  
195 groups and represented 11.64% of the total polymorphic fragments (S5 Table). The  
196 SuSy + Arbi2 showed the largest number of putative exclusive fragments (18), all  
197 present in the representative accessions of *Erianthus* spp. This specie was the one that  
198 had more putative exclusive fragments (49), followed by *S. spontaneum* (08), *S.*  
199 *robustum* (06), *S. officinarum* (01) and *S. barberi* (01). In the BB group, three putative  
200 exclusive fragments were present, representing 0.51% of the total polymorphic  
201 fragments.

202 Considering all predefined groups (A, BB and FH), the AMOVA results  
203 revealed that the molecular variance found by TRAP markers was higher within  
204 populations than among populations (Table 1). The genetic differentiation value ( $\Phi_{PT}$ )  
205 obtained between A and BB groups was 0.14, which means that 14% of the total  
206 variation found by the TRAP markers was distributed between these two groups, while  
207 86% was within them. The  $\Phi_{PT}$  values obtained between A and FH groups ( $\Phi_{PT} = 0.05$ )

208 and between BB and FH groups ( $\Phi_{PT} = 0.03$ ) were lower than that observed between A  
209 and BB groups. In addition,  $\Phi_{PT}$  values were significant for all comparisons between  
210 groups ( $P < 0.001$ ).

211



212 **Table 1. Analysis of molecular variance (AMOVA) between predefined groups A, BB and FH of the Brazilian Panel of Sugarcane**  
 213 **Genotypes (BPSG).**

|                                                | Source of variation | d.f. | Sum of squares | Variance components | Percentage of variation |
|------------------------------------------------|---------------------|------|----------------|---------------------|-------------------------|
| BB and A                                       | Among population    | 1    | 944.93         | 9.28                | 14%                     |
|                                                | Within populations  | 209  | 12345.46       | 59.07               | 86%                     |
|                                                | Total               | 210  | 13290.39       | 68.35               |                         |
| Genetic differentiation ( $\Phi_{PT}$ ): 0.14* |                     |      |                |                     |                         |
| FH and A                                       | Among population    | 1    | 242.44         | 3.38                | 5%                      |
|                                                | Within populations  | 113  | 7943.11        | 70.29               | 95%                     |
|                                                | Total               | 114  | 8185.55        | 73.68               |                         |
| Genetic differentiation ( $\Phi_{PT}$ ): 0.05* |                     |      |                |                     |                         |
| BB and FH                                      | Among population    | 1    | 138.34         | 1.48                | 3%                      |
|                                                | Within populations  | 174  | 8761.99        | 50.36               | 97%                     |
|                                                | Total               | 175  | 8900.33        | 51.83               |                         |
| Genetic differentiation ( $\Phi_{PT}$ ): 0.03* |                     |      |                |                     |                         |

214 d.f.: degrees of freedom.

215 \* $P < 0.001$ .

216

## 217 **Principal component analysis**

218 Principal component analysis (PCA) was firstly performed based on 595 TRAP  
219 fragments with all 254 accessions of BPSG, which includes accessions of predefined  
220 groups A, BB and FH (Fig 1A). Considering that the panel under study presents  
221 accessions of two genera, *Saccharum* and *Erianthus*, a second PCA was performed  
222 without accessions of the genus *Erianthus* (using 546 TRAP fragments) aiming to  
223 detect some clustering among the *Saccharum* accessions (Fig 1B).

224 Thereby, in the Fig 1A the first two principal components, PC1 and PC2,  
225 explained 17.8% of the total variability expressed among accessions. According to PC1  
226 it is possible to note that *Erianthus* accessions (75//09 ERIANTHUS, H.  
227 KAWANDANG, IM76-227, IN84-73, IN84-77 and IN84-83) were grouped in an  
228 isolated cluster from the others accessions. In addition, *S. spontaneum* accessions were  
229 allocated together (IN84-58, IN84-82, IN84-88, KRAKATAU and SES205A). In  
230 contrast, accessions of the FH group were distributed in non-clustered way; some FH  
231 accessions were allocated near to accessions of the A group (for example, CR72/106  
232 and US60-31-3), while others were closer to accessions of BB group (for example,  
233 NCo-310 and EK28). The BB group showed a tendency of clustered greater than A and  
234 FH groups, and it is possible to note two subgroups within the group.

235 Already in the second PCA, PC1 and PC2 explained 12.7% of the total  
236 variability expressed among accessions (Fig 1B). The accessions of A group were  
237 distributed over PC1, being some accessions of *S. officinarum* (for example, WHITE  
238 TRANSPARENT, CAIANA RISCADA, SAC OFFIC 8272, NG21-21, NG57-221,  
239 CAYANA, WHITE MAURITIUS and AJAX) closely positioned with accessions  
240 originated from breeding programs. In addition, accessions representatives of *S. barberi*  
241 (GANDACHENI and WHITE PARARIA) and *S. sinense* (MANERIA) were also

242 nearby of improved accessions. The accessions of FH group were distributed almost  
243 equally along PC1 and PC2, which can be observed by the blue ellipse with center near  
244 the 0-0 coordinate and also by presence of FH accessions in the four quadrants of the  
245 graph. The BB group apparently showed the division of their accessions into two  
246 clusters, one with most accessions in the second quadrant and other in the fourth  
247 quadrant of the graph. In general, this separation agrees with pedigree information, for  
248 example, the RB965917 and RB965902 accessions are full-sibs originated from cross  
249 between RB855453 and RB855536, all of them were positioned into cluster at second  
250 quadrant. Furthermore, RB845197, RB845210, RB845257, RB855036, RB855002 and  
251 RB855113 are full-sibs originated from cross between RB72454 and SP70-1143, all of  
252 them allocated into cluster at fourth quadrant. The presence of half-sibs should also  
253 contribute to this separation, for example, RB806043, RB815521, RB83102,  
254 RB855533, SP71-6163, SP716949, SP81-1763, RB815627, RB815690 and RB835054  
255 accessions sharing the parent NA56-79 and all allocated into cluster at second quadrant.  
256 Likewise IAC87-3396, SP83-2847, RB845197, RB845210, RB845257, RB855036,  
257 RB855002, RB855070, RB855113, RB855595 and RB855598 accessions sharing the  
258 parent SP70-1143 and all were positioned into cluster at fourth quadrant.

259

260 **Fig 1. Principal Components Analysis (PCA) of the Brazilian Panel of Sugarcane**  
261 **Genotypes (BPSG) based on TRAP markers.** (a) PCA performed with all 254  
262 accessions of the BPSG. (b) PCA performed with 248 accessions of the BPSG, i.e.,  
263 without accessions representatives of the genus *Erianthus*. The different colors indicates  
264 the predefined groups: ancestors accessions (A) in orange; accessions of *Saccharum*  
265 spp. hybrids from Brazilian breeding programs (BB) in black; accessions of *Saccharum*  
266 spp. hybrids from foreign breeding programs (FH) in blue. The A group in the Fig 1A

267 was composite by ancestors accessions of the genus *Saccharum* and *Erianthus*, while in  
268 the Fig 1B, the A group was composite only by accessions of the genus *Saccharum*.

269

## 270 **STRUCTURE analysis**

271 According to the STRUCTURE analysis (without accessions of genus  
272 *Erianthus*), the best  $k$  value was two ( $\Delta k = 399.43$ , S1 Fig), suggesting that the 248  
273 accessions of genus *Saccharum* could be divided into two subpopulations, P1 and P2,  
274 containing 178 and 70 accessions, respectively (Fig 2). P1 had 164 accessions belonging  
275 to BB and FH groups and only 14 accessions belonging to A group. The ancestors  
276 accessions into P1 were representatives of *S. officinarum* (AJAX, BLACK BORNEO,  
277 CAIANA RISCADA, CAYANA, CERAM RED, FORMOSA, LAUKONA, NG21-21,  
278 NG57-221, SAC OFFIC 8272, WHITE MAURITIUS and WHITE TRANSPARENT),  
279 *S. barberi* (GANDACHENI) and *S. sinense* (MANERIA), in according with the  
280 evolutionary and breeding history of sugarcane. In contrast, P2 had 61 accessions  
281 belonging to A group and only nine accessions were improved accessions  
282 (ARUNDOID B, CR72/106, Q165, RB83100, RB002601 and US60-31-3, Co285,  
283 F150, HJ5741). Therefore, P1 had most of the accessions of BB and FH groups, while  
284 P2 had most of accessions of A group. Furthermore, 20 accessions showed probabilities  
285 to be part of both subpopulations (Fig 2). Among these, seven accessions were more  
286 likely to be allocated in P1 (RAGNAR, BLACK BORNEO, FORMOSA, LAUKONA,  
287 POJ161, Q70 and RB002754) and the other 13 accessions were more likely to be  
288 included in P2 (ARUNDOIDB, BADILA, CAINA VERDADEIRA, CANA BLANCA,  
289 Co285, F150, HJ5741, IS76-155, IN84-105, MANAII, Q165, RB83100 and SAC  
290 OFFIC 8284).

291

292 **Fig 2. Phylogenetic tree estimated through Neighbor-Joining method for 248**  
293 **accessions of the Brazilian Panel of Sugarcane Genotypes (BPSG).** The names of the  
294 accessions belonging to predefined groups were write with different colors: ancestors  
295 accessions (A) in orange; accessions of *Saccharum* spp. hybrids from Brazilian breeding  
296 programs (BB) in black; and accessions of *Saccharum* spp. hybrids from foreign  
297 breeding programs (FH) in blue. The A group was composite by ancestors accessions of  
298 the genus *Saccharum*. The circumference around the phylogenetic tree represents the  
299 two subpopulations estimated by the STRUCTURE analysis and the green and yellow  
300 colors indicate accessions of the P1 and P2 subpopulations, respectively. The three  
301 major clades C1, C2 and C3 were indicated within the phylogenetic tree with square,  
302 triangle and circle in black.

303

## 304 **Genetic dissimilarity and phylogenetic analysis**

305 The number of TRAP fragments used in this study was sufficient to estimate the  
306 pair-wise genetic dissimilarity with an acceptable level of accuracy. Considering the  
307 546 fragments used in this analysis the CV was 8.64% (S2 Fig), under the threshold  
308 previously established of 10%. An amount around 400 fragments would be sufficient to  
309 obtain a CV average estimate around 10%.

310 The higher dissimilarity value was found between SES205A (*S. spontaneum*)  
311 and CAIANA FITA (*S. officinarum*) accessions (0.62), and the lower dissimilarity value  
312 was between CB40-13 and RB721012 accessions (0.10), both belonging to BB group.  
313 The average dissimilarity values within the A, BB and FH groups were 0.36, 0.25 and  
314 0.29, respectively. Considering a subdivision of BB group according to different  
315 Brazilian breeding programs, the average dissimilarities were 0.23, 0.24, 0.26 and 0.26  
316 within CB, IAC, RB and IAC subgroups, respectively. The highest average

317 dissimilarities were found when A group was compared with FH group (0.34) and BB  
318 group (average of 0.34). On the other hand, smaller average dissimilarities occurred  
319 between and within of the FH group and BB subgroups (CB, IAC, RB and SP), ranged  
320 from 0.23 (within CB subgroup) to 0.29 (within FH group and between FH group and  
321 SP subgroup).

322         The phylogenetic tree carried out with accessions of genus *Saccharum* suggests  
323 the presence of three major clades (Fig 2). The clade C1 was composed mainly by  
324 accessions of A group (68 accessions), followed by 18 FH accessions (AKBAR,  
325 CINCA77-316, Co285, Co997, Co449, CP51-22, CP52-68, CR72/106, D625, F150,  
326 H59-1966, HJ5741, MALI, POJ161, Q70, Q165, RAGNAR and US60-31-3) and 31 BB  
327 accessions (CB36-24, CB36-25, CB4013, CB41-76, CB46-47, IAC48-65, IAC82-2045,  
328 RB002601, RB002700, RB721012, RB735275, RB736018, RB785750, RB805276,  
329 RB806043, RB815690, RB83102, RB845286, RB855035, RB855070, RB855463,  
330 RB865214, SP70-1005, SP70-3370, SP79-2233, SP79-2313, SP80-1816, SP81-1763,  
331 SP83-5073, SP86-155 and SP89-1115). On the other hand, the clades C2 and C3 were  
332 composed largely for BB accessions. Clade C2 was composed by 32 BB accessions, 10  
333 FH accessions (AROUNDROID B, Co331, CP53-76, D152, F36-819, H53-3989, Na56-  
334 79, POJ2878, Q117 and TUC71-7) and four A accessions (CAIANA RISCADA,  
335 MANERIA, NG21-21 and SAC OFFIC 8284). Finally, clade C3 had 74 BB accessions,  
336 eight FH accessions (Co290, Co419, Co740, EK28, F31-962, L60-14, NCo-310 and  
337 R570) and three accessions from the A group (CERAM RED, NG57-221 and WHITE  
338 MAURITIUS). Furthermore, the clustering of the phylogenetic tree was similar to the  
339 arrangement of accessions in the PCA (Fig 1B) and, in general, the composition of  
340 clades was also in agreement with pedigree information. Evidence of this is that some  
341 accessions that were widely used as parents by Brazilian breeding programs were

342 grouped at same clade with their progenies of full-sibs or half-sibs. In clade C2, there  
343 are three interesting cases: a) F36-819, IAC58-480 and IAC51-205 are half-sibs with  
344 the parent POJ2878 in common; b) RB835054, RB83100, RB855533 and SP71-6949  
345 are half-sibs with the parent NA56-79 in common; and c) RB855156, RB855196,  
346 RB855070, RB855077, RB855574, RB855589 and RB855453 are half-sibs with the  
347 parent TUC71-7 in common. In clade C3, for example, the full-sibs RB845197,  
348 RB845210, RB845239, RB845257, RB855036, RB855002, RB855113 and RB855536  
349 were grouped together with their parents SP70-1143 and RB72454. On the other hand,  
350 although present to a lesser extent, we also noticed that some full-sib accessions were  
351 allocated in different clades and so partially diverging from pedigree information, as in  
352 the case of CB40-13 and CB40-77 accessions, being the first positioned in clade C1 and  
353 the second in clade C3. The parents POJ2878 and Co290 were positioned in clades C2  
354 and C3, respectively.

355

## 356 **Discussion**

357 TRAP markers have been used in assessment of genetic diversity in plants with  
358 complex genomes such as sugarcane and wheat [21,25,29,30,54-60]. The BPSG was  
359 composed by accessions representatives of different species of the *Saccharum* complex  
360 and also by different hybrids from Brazilian and foreign breeding programs, which  
361 constitutes a broad genetic background and allelic pool to be explored. So, the high  
362 variability and genome complexity into BPSG contributed to the large number of  
363 polymorphic fragments for each TRAP marker. The genome complexity of the modern  
364 hybrids comprises variable number of chromosomes between 100 and 130  
365 [10,12,15,61,62], variable ploidy levels and copies of the homo(eo)logous chromosomes

366 [12,17,63,64], gene duplication [17,64] and also genome modifications as insertions and  
367 deletions [12,34].

368 According to marker nature, is expected that genomic markers, such as AFLP  
369 and SSR markers, show higher polymorphism content than functional markers, since in  
370 transcribed regions the DNA sequences are more conserved [26,29]. However, PIC and  
371 DP averages values obtained in our study by functional TRAP markers were higher than  
372 related by other works in sugarcane [21,29,30,59,60] even when these values were  
373 compared with genomic markers [3,23]. Moreover, functional markers are more  
374 efficient for gene tagging than genomic markers and, consequently, facilitate the  
375 introgression of alleles that potentially control agronomic traits of interest by breeding  
376 programs [21,28,32,57]. Thereby, putative exclusive fragments for species or a specific  
377 accession could be evaluated through mapping association to further introgression  
378 process. Here, among the *Saccharum* genus, the *S. spontaneum* showed the highest  
379 number of putative exclusive fragments, all of them for TRAP makers related with  
380 sucrose metabolism (S5 Table). *S. spontaneum* is the wild species considered the most  
381 diverse species of the genus *Saccharum* due to its great ecogeographic distribution [65],  
382 show generally low sucrose levels and is used to introgress traits such as ~~high yield,~~  
383 increased disease resistance, and ratooning [13]. So, our results suggest that *S.*  
384 *spontaneum* also could be promote variability for genes involved in sucrose metabolism  
385 and **that these putative exclusive fragments probably have negative effects on the**  
**386 sucrose metabolism.** Furthermore, the low frequency of putative exclusive fragments in  
387 the BB group suggests that ancestor accessions did not encompass the whole genetic  
388 pool used in prior breeding programs or that these new alleles observed in breeding  
389 accessions may have emerged over time as a result of changes in the genome as  
390 mutations and duplications [23].



391 The degree of the genetic differentiation estimate ( $\Phi_{PT}$ ), through AMOVA,  
392 indicated that the molecular variance found by TRAP markers was higher within  
393 populations than among populations. The results found in the current assignment are in  
394 accordance with previous studies in sugarcane [23,66,67] and also with other polyploids  
395 crops such as sweet potato, wheat and cotton [68-70]. The population differentiation  
396 depends on the balance among migration, mutation, and drift. In polyploids species,  
397 such as sugarcane, the level of diversity within populations is naturally higher when  
398 comparing with species with lower ploidy levels, mainly because in polyploids i) there  
399 are expected more mutation events, ii) mendelian segregation is not necessarily  
400 completely random (double reduction, disomic inheritance and polysomic inheritance  
401 may be occurs), iii) the polyploidy migrant carries more allele copies due the high  
402 number of chromosome copies, and iv) the force of genetic drift is weaker [71,72].

403 Comparing modern sugarcane cultivars with basic germplasm through SSR  
404 markers, Manechini et al. [23] found a strong genetic differentiation corresponded to  
405 17%. In addition, Júnior et al. [73] comparing wild relatives, traditional cultivars, and  
406 modern cultivars based on TRAP markers related with sucrose and lignin metabolisms  
407 found a moderate genetic differentiation, around to 7%. Here, this value also was  
408 moderate and correspondent to 14% and 5% when we comparing ancestors accessions  
409 with BB and FH groups, respectively. The higher differentiation among A and BB  
410 groups suggest that there was extensive use of a small number of ancestors accessions,  
411 mainly representatives of *S. officinarum* and *S. spontaneum*, in the first interspecific  
412 crosses and also that a preferential gene complexes were fixed during breeding process  
413 to develop modern Brazilian sugarcane cultivars according to yield performance  
414 interests and environmental limitations. Furthermore, mainly in the BB group, the  
415 accessions shared a larger number of parents between them [62], which contribute to

416 increase the divergence with the A group. On the other hand, the moderate genetic  
417 differentiation among A and FH groups and the low genetic differentiation (3%)  
418 detected among BB and FH groups suggest that FH accessions have few generations  
419 from the first breeding crossings and that may be part of the genealogy of BB  
420 accessions. Indeed, the FH accessions included in the BPSG were introduced for  
421 contribute with Brazilian breeding programs [62,74].

422         The results of the AMOVA are interesting, since TRAP markers were partially  
423 anchored in genes under selection process (sucrose and lignin metabolism), thus not  
424 anonymous, and even were able to detect genetic differentiation within and among  
425 accessions of the compared groups. This indicates that even for these genes there is still  
426 possibility of introgression of new alleles, opening front to germplasm exchange and  
427 assisted selection with functional molecular markers, like TRAP markers, in outcrossing  
428 heterozygous species such as sugarcane. Moreover, further studies could be conducted  
429 to determine other genes under selection with potential to differentiate populations and  
430 enable better management of crosses between and within the groups for introgression of  
431 favorable alleles [13,19,28,66,73-76].

432         Considering the PCA approach it was possible to verify divergences between  
433 and within the predefined groups. In the first PCA (Fig 1A), into A group, the *Erianthus*  
434 accessions were clearly divergent from the *Saccharum* accessions, supporting the  
435 taxonomic evidence which assigned each of them to a separate genus [77]. Our result  
436 agrees with other studies that used AFLP [78,79], cpSSR [80], TRAP [21,30,59], SRAP  
437 [55] and SSR [3,81] markers. The introgression of alleles of the *Erianthus* genus in  
438 sugarcane breeding programs, mainly from *E. arundinaceus*, has been evaluated in  
439 recent years to increase adaptability, disease resistance, drought resistance and biomass  
440 production [82,83]. In this study, we removed *Erianthus* accessions from subsequent

441 analysis, since clustering was best viewed when only *Saccharum* accessions were  
442 maintained. Despite this, further studies may be conducted to evaluate other regions of  
443 the genome closely related to the outstanding traits of the *Erianthus* genus.

444         Thereby, when we analyzed the second PCA (Fig 1B), the close position  
445 between breeding accessions and some representatives of *S. officinarum* (for example,  
446 AJAX, CAIANA RISCADA, CAYANA, NG21-21, NG57-221, SAC OFFIC 8272 and  
447 WHITE MAURITIUS) became more evident and could be explained by the fact that  
448 this specie was one of the main ancestors of modern sugarcane cultivars, which carry  
449 80-85% of the *S. officinarum* genetic base [15]. Furthermore, the evolutionary history of  
450 sugarcane may be inferred in the clustering of the second PCA for the A group, since  
451 the *S. barberi* accessions (AGOULE, CHIN, CHUNNE, GANDA CHENI and WHITE  
452 PARARIA) were close positioned with some *S. officinarum* accessions (CAIANA  
453 RISCADA, CAIANA VERDADEIRA, CANA BLANCA, IN84-103, NG21-17, SAC  
454 OFFIC 8272, SAC OFFIC 8276, SAC OFFIC 8280 and WHITE MAURITIUS) and  
455 some *S. spontaneum* accessions (KRAKATAU and SES205A), possibly because *S.*  
456 *barberi* were originated from the hybridization of *S. officinarum* with *S. spontaneum*  
457 [17,18,84-86]. The relatedness of modern sugarcane cultivars also appears to be  
458 represented in the second PCA, since some FH accessions (NA56-79, POJ2878,  
459 TUC71-7, Co290, Co331, Co413 and Co419) used as parents in crosses to obtain  
460 Brazilian cultivars were close positioned of BB accessions, for example, the FH  
461 accession TUC71-7 was near to their progenies RB855453, RB855574 and RB855196.  
462 It is interesting to note the central position of NA56-79, which was used as parent of  
463 several accessions [74] that were located into BB subgroups in the second quadrant  
464 (RB806043, RB815521, RB83102, RB855533, SP71-6163, SP71-6949, SP81-1763,  
465 RB815627, RB815690 and RB835054) and in the fourth quadrant (RB725828,

466 RB805276, SP71-1406, SP71-799, SP79-1011, RB835019 and RB835089) of the  
467 graph. On the other hand, some FH accessions, for example POJ161, Co285, Q70 and  
468 US60-31-3 were found near to accessions of the A group, suggesting that this  
469 accessions could be have few generations from the crosses between the firstly ancestors  
470 (TropGeneDB Sugarcane:  
471 <http://tropgenedb.cirad.fr/tropgene/JSP/interface.jsp?module=SUGARCANE>).

472         When analyzed the genetic structure through STRUCTURE software, almost all  
473 ancestors were separate of the improved accessions, especially BB accessions (Fig 2).  
474 However, the STRUCTURE results should be viewed with caution, since it is based on  
475 the assumption that all loci are considered to be in Hardy-Weinberg equilibrium within  
476 each population, without any linkage disequilibrium among loci, if they are not closely  
477 linked [87]. Thus, for complex genomes such as sugarcane, these assumptions are not  
478 fulfilled, even more when are used non-neutral markers related with traits under  
479 selection during generations [24,86,88]. Nevertheless, the comparison between PCA,  
480 STRUCTURE results and also phylogenetic tree (Fig 2), showed a good way to infer  
481 the genetic structure for BPSG.

482         In the phylogenetic tree, which was obtained from genetic dissimilarity matrix,  
483 there was a great similarity with the clustering seen in PCA and the almost all ancestors  
484 were grouped within a cluster such as suggested by STRUCTURE analysis. In general,  
485 the family relatedness between the BPSG accessions was present in the clusters within  
486 the clades of the phylogenetic tree, which was in agreement with the sugarcane  
487 evolutionary and breeding history. In addition, the high dissimilarity value (0.62) was  
488 found between accessions representatives of *S. officinarum* (CAIANA FITA) and *S.*  
489 *spontaneum* (SES205A), two morphologically distinct species used in the firstly  
490 interspecific crosses of sugarcane, while the low dissimilarity value (0.10) was found

491 between two BB accessions, CB40-13 and RB721012. Both have in their genealogies  
492 four generations and sharing at least three ancestors, since RB721012 was obtained  
493 from a polycross (RIDESA: [www.ridesaufscar.com.br](http://www.ridesaufscar.com.br); TropGeneDB Sugarcane:  
494 <http://tropgenedb.cirad.fr/tropgene/JSP/interface.jsp?module=SUGARCANE>).

495 Furthermore, as expected, the highest average dissimilarities (0.34) were found  
496 when A group was compared with FH and BB groups. Otherwise, the lower average  
497 dissimilarity within the BB group (0.25) suggests that the Brazilian accessions shared  
498 approximately 75% of the genic regions assessed with TRAP markers, which indicates  
499 possibly a level of genetic uniformity for these loci between BB accessions. Similar  
500 results were found by Alwala et al. [21], Devarumath et al. [59] and Manechini et al.  
501 [15]. As a first approach to overcome this finding and considering that small number of  
502 initial parents contributed to modern hybrids [3], the incorporation of distinct genetic  
503 background may be useful to raise the genetic gain rate for the traits of interest,  
504 especially for those under high selection pressure. Despite this, although less frequently,  
505 some half-siblings (for example, CB40-13 and CB40-77) and full-sibs (for example,  
506 RB855589 and RB855598) were allocated to distinct clades, which is not uncommon in  
507 outcrossing heterozygous species, such as sugarcane, since they are characterized by  
508 high ploidy and may present genetic differences due to chromosomal inconsistencies  
509 during meiosis [10,17,63]. In this way, we can infer that the sugarcane genetic base did  
510 not narrow as much as some studies point out [20,32,89], since the genetic complexity  
511 mentioned above is able to promote variability even at loci that were possibly fixed by  
512 selection over decades. The results provide by AMOVA also corroborate with these  
513 findings. The high linkage disequilibrium extend detected in sugarcane [24,86] regulates  
514 the exclusive allelic reservoir of each genotype that is transmitted to its progeny, which  
515 allowed the action of classic breeding programs to the present day. The use of molecular

516 tools, as demonstrated in this study, can contribute to estimate genetic diversity and  
517 detected population structure in core collections, to increase the assertiveness of the  
518 crosses and efficiency of introgression of favorable alleles.

519

## 520 **Acknowledgments**

521 This work was supported by grants from the FINEP (Financiadora de Estudos e  
522 Projetos), FAPESP (Fundação de Amparo à Pesquisa de São Paulo, 08/57908-6) and  
523 CNPq, Conselho Nacional de Desenvolvimento Científico e Tecnológico, 574002/2008-  
524 1). CM received a master's fellowship from CAPES (Coordenação de Aperfeiçoamento  
525 de Pessoal de Nível Superior – Finance Code 001).

526

## 527 **References**

- 528 1. Singh RK, Singh RB, Singh SP, Sharma ML. Identification of sugarcane  
529 microsatellites associated to sugar content in sugarcane and transferability to other  
530 cereal genomes. *Euphytica*. 2011;182: 335–354..  
531
- 532 2. Moore PH, Paterson AH, Tew T. Sugarcane: the crop, the plant, and domestication.  
533 In: Moore PH, Botha FC, editors. *Sugarcane: Physiology, Biochemistry, and*  
534 *Functional Biology*. Wiley-Blackwell Publishing; 2013. pp. 1-17.  
535
- 536 3. Ali A, Pan Y-B, Wang Q-N, Wang J-D, Chen J-L, Gao S-J. Genetic diversity and  
537 population structure analysis of *Saccharum* and *Erianthus* genera using  
538 microsatellite (SSR) markers. *Sci. Rep.* 2019;9: 395.  
539
- 540 4. Daniels J, Roach BT. Taxonomy and evolution. In: Heinz DJ, editor. *Sugarcane*  
541 *Improv. through breeding*. Elsevier Science; 1987. pp. 7–84.  
542

- 543 5. Matsuoka S, Garcia AAF, Arizono H. Melhoramento da cana-de-açúcar. In: Borém  
544 A, editor. Melhoramento de espécies cultivadas. UFV; 2005. pp. 225-274.  
545
- 546 6. Zhang J, Zhou M, Walsh J, Zhu L, Chen Y, Ming R. Sugarcane genetics and  
547 genomics. In: Moore PH, Botha FC, editors. Sugarcane: Physiology,  
548 Biochemistry, and Functional Biology. Wiley-Blackwell Publishing; 2013. pp.  
549 623-643.  
550
- 551 7. Todd J, Wang J, Glaz B, Sood S, Ayala-Silva T, Nayak SN, et al. Phenotypic  
552 characterization of the Miami World Collection of sugarcane (*Saccharum* spp.)  
553 and related grasses for selecting a representative core. Genet. Resour. Crop. Ev.  
554 2014;61: 1581-1596.  
555
- 556 8. Irvine, J. E. *Saccharum* species as horticultural classes. Theor. Appl. Genet. 1999;98:  
557 186-194.  
558
- 559 9. Grivet L, Daniels C, Glaszmann JC, D’Hont A. A review of recent molecular  
560 genetics evidence for sugarcane evolution and domestication. Ethnobot. Res. App.  
561 2004;2: 9-17.  
562
- 563 10. Vieira MLC, Almeida CB, Oliveira CA, Tacuatiá LO, Munhoz CF, Cauz-Santos L,  
564 et al. Revisiting Meiosis in Sugarcane: Chromosomal Irregularities and the  
565 Prevalence of Bivalent Configurations. Front. Genet. 2018;9: 213.  
566
- 567 11. D’Hont A, Glaszmann JC. Sugarcane genome analysis with molecular markers, a  
568 first decade of research. Proc. Int. Soc. Sugarcane Technol. 2001;24: 556-559.  
569
- 570 12. Zhang J, Zhang X, Tang H, Zhang Q, Hua X, Ma X, et al. Allele-defined genome of  
571 the autopolyploid sugarcane *Saccharum spontaneum* L. Nature genet. 2018;50:  
572 1565.  
573
- 574 13. Aitken K, Li J, Piperidis G, Qing C, Yuanhong F, Jackson P. Worldwide genetic  
575 diversity of the wild species *Saccharum spontaneum* and level of diversity  
576 captured within sugarcane breeding programs. Crop. Sci. 2018;58: 218-229.

577

578 14. D'Hont A. Unravelling the genome structure of polyploids using FISH and GISH;  
579 examples of sugarcane and banana. *Cytogenet. Genome Res.* 2005;109: 27-33.

580

581 15. Garsmeur O, Droc G, Antonise R, Grimwood J, Potier B, Aitken K, et al. A mosaic  
582 monoploid reference sequence for the highly complex genome of sugarcane. *Nat.*  
583 *Commun.* 2018;9: 2638.

584

585 16. Ma P, Yuan Y, Shen Q, Jiang Q, Hua X, Zhang Q, et al. Evolution and Expression  
586 Analysis of Starch Synthase Gene Families in *Saccharum spontaneum*. *Trop.*  
587 *Plant Biol.* 2019;12: 158–173.

588

589 17. Thirugnanasambandam PP, Hoang NV, Henry RJ. The challenge of analyzing the  
590 sugarcane genome. *Front. Plant. Sci.* 2018;9: 616.

591

592 18. Singh RB, Singh B, Singh RK. Evaluation of Genetic Diversity in *Saccharum*  
593 Species Clones and Commercial Varieties Employing Molecular (SSR) and  
594 Physiological Markers. *Indian J. Plant. Genet. Res.* 2018;31: 17-26.

595

596 19. Llerena JPP, Figueiredo R, Brito MS, Kiyota E, Mayer JLS, Araujo P, et al.  
597 Deposition of lignin in four species of *Saccharum*. *Sci. Rep.* 2019;9: 5877.

598

599 20. Lima MLA, Garcia AAF, Oliveira KM, Matsuoka S, Arizono H, Souza CL, et al.  
600 Analysis of genetic similarity detected by AFLP and coefficient of parentage  
601 among genotypes of sugar cane (*Saccharum* spp.). *Theor Appl Genet.* 2002;38:  
602 104-30.

603

604 21. Alwala S, Suman A, Arro JA, Veremis JC, Kimbeng CA. Target region  
605 amplification polymorphism (TRAP) for assessing genetic diversity in sugarcane  
606 germplasm collections. *Crop. Sci.* 2006;46: 448-455.

607

608 22. Dos Santos JM, Filho LSC, Soriano ML, Silva PP, Nascimento VX, Barbosa GVS,  
609 et al. Genetic diversity of the main progenitors of sugarcane from the RIDESA  
610 germplasm bank using SSR markers. *Ind. Crop Prod.* 2012;40: 145-150.



611

612 23. Manechini JRV, Costa JB, Pereira BT, Carlini-Garcia L, Xavier MA, Landell MGA,  
613 Pinto LR. Unraveling the genetic structure of Brazilian commercial sugarcane  
614 cultivars through microsatellite markers. PLoS One. 2018;13: e0195623.

615

616 24. Barreto FZ, Rosa JRBF, Balsalobre TWA, Pastina MM, Silva RR, Hoffmann HP, et  
617 al. A genome-wide association study identified loci for yield component traits in  
618 sugarcane (*Saccharum* spp.). PloS One. 2019;14: e0219843.

619

620 25. Singh RB, Singh B, Singh RK. Study of genetic diversity of sugarcane (*Saccharum*)  
621 species and commercial varieties through TRAP molecular markers. Indian J.  
622 Plant Physiol. 2017;22: 332-338..

623

624 26. Parthiban S, Govindaraj P, Senthilkumar S. Comparison of relative efficiency of  
625 genomic SSR and EST-SSR markers in estimating genetic diversity in sugarcane.  
626 3 Biotech. 2018;8: 144.

627

628 27. You Q, Pan Y-B, Gao S-W, Wang Q-N, Su Y-C, Yang Y-Q, et al. Genetic Diversity  
629 Analysis of Sugarcane Germplasm Based on Fluorescence-Labeled Simple  
630 Sequence Repeat Markers and a Capillary Electrophoresis-based Genotyping  
631 Platform. Sugar Tech. 2016;18: 380-390.

632

633 28. Tienderen PH, de Haan AA, van der Linden CG, Vosman B. Biodiversity  
634 assessment using markers for ecologically important traits. Trends Ecol. Evolut.  
635 2002;17: 577-582.

636

637 29. Creste S, Accoroni KAG, Pinto LR, Vencovsky R, Gimenes MA, Xavier MA, et al.  
638 Genetic variability among sugarcane genotypes based on polymorphisms in  
639 sucrose metabolism and drought tolerance genes. Euphytica. 2010;172: 435-446.

640

641 30. Suman A, Ali K, Arro J, Parco AS, Kimbeng CA, Baisakh N. Molecular diversity  
642 among members of the *Saccharum* complex assessed using TRAP markers based  
643 on lignin-related genes. Bioenergy Res. 2012;5: 197-205.

644

- 645 31. Kasirajan L, Hoang NV, Furtado A, Botha F, Henry RJ. Transcriptome analysis  
646 highlights key differentially expressed genes involved in cellulose and lignin  
647 biosynthesis of sugarcane genotypes varying in fiber content. *Sci. Rep.* 2018;8:  
648 11612.
- 649
- 650 32. Da Silva JA, Veremis J, Solís-Gracia N. *Saccharum spontaneum* gene tagging by  
651 markers developed from sugarcane expressed sequence tags. *Subtrop. Plant Sci.*  
652 2007;58: 6-14.
- 653
- 654 33. Souza CM. Molecular diversity and genetic structure of *Saccharum* complex  
655 accessions as revealed by TRAP markers. Repositório UFSCar. Available from:  
656 <https://repositorio.ufscar.br/handle/ufscar/11771> Cited 23 March 2020.
- 657
- 658 34. Balsalobre TWA, Pereira GS, Margarido GRA, Gazaffi R, Barreto FZ, Anoni CO, et  
659 al. GBS-based single dosage markers for linkage and QTL mapping allow gene  
660 mining for yield-related traits in sugarcane. *BMC genomics.* 2017;18: 72.
- 661
- 662 35. Cardoso-Silva CB, Costa EA, Mancini MC, Balsalobre TWA, Canesin LEC, Pinto  
663 LR, et al. De novo assembly and transcriptome analysis of contrasting sugarcane  
664 varieties. *PLoS One.* 2014;9: e88462.
- 665
- 666 36. Al-Janabi SM, Forget L, Dookun A. An improved and rapid protocol for the  
667 isolation of polysaccharide and polyphenol-free sugarcane DNA. *Plant. Mol. Biol.*  
668 *Report.* 1999;17: 1-8.
- 669
- 670 37. Li G, Quiros CF. Sequence-related amplified polymorphism (SRAP), a new marker  
671 system based on a simple PCR reaction: its application to mapping and gene  
672 tagging in *Brassica*. *Theor. Appl. Genet.* 2011;103: 455-461.
- 673
- 674 38. Creste S, Neto AT, Figueira A. Detection of single sequence repeat polymorphisms  
675 in denaturing polyacrylamide sequencing gels by silver staining. *Plant. Mol. Biol.*  
676 *Report.* 2001;19: 299-306.
- 677

- 678 39. Botstein D, White RL, Skolnick M, Davis RW. Construction of a genetic linkage  
679 map in man using restriction fragment length polymorphisms. *Am. J. Hum. Genet.*  
680 1980;32, 314–331.  
681
- 682 40. Tessier C, David J, This P, Boursiquot JM, Charrier A. Optimization of the choice  
683 of molecular markers for varietal identification in *Vitis vinifera L.* *Theor. Appl.*  
684 *Genet.* 1999;98: 171-177.  
685
- 686 41. Oliveira KM, Pinto LR, Marconi TG, Mollinari M, Ulian EC, Chabregas SM, et al.  
687 Characterization of new polymorphic functional markers for sugarcane. *Genome.*  
688 2009;52: 191-209.  
689
- 690 42. Goodstein DM, Shu S, Howson R, Neupane R, Hayes RD, Fazo J, et al. Phytozome:  
691 a comparative platform for green plant genomics. *Nucleic Acids Res.* 2012;40:  
692 1178-1186.  
693
- 694 43. Peakall PE, Smouse R. GenAlEx 6.5: genetic analysis in Excel. Population genetic  
695 software for teaching and research—an update. *Bioinformatics.* 2012;28: 2537-  
696 2539.  
697
- 698 44. R Development Core Team. R: a language and environment for statistical  
699 computing. Vienna: R Foundation for Statistical Computing; 2016.  
700
- 701 45. Lê S, Josse J, Husson F. FactoMineR: an R package for multivariate analysis. *J.*  
702 *Stat. Softw.* 2008;25: 1-18.  
703
- 704 46. Kassambara A, Mundt F. Factoextra: Extract and visualize the results of  
705 multivariate data analyses. R package version. 2016;76: 1-74.  
706
- 707 47. Pritchard JK, Stephens M, Donnelly P. Inference of population structure using  
708 multilocus genotype data. *Genetics.* 2000;155: 945-959.  
709

- 710 48. Evanno G, Regnaut S, Goudet J. Detecting the number of clusters of individuals  
711 using the software STRUCTURE: a simulation study. *Mol. Ecol.* 2005;14: 2611-  
712 2620.
- 713
- 714 49. Earl DA, VonHoldt BM. STRUCTURE HARVESTER: a website and program for  
715 visualizing STRUCTURE output and implementing the Evanno method.  
716 *Conserv.Genet. Resour.* 2012;4: 359-361.
- 717
- 718 50. Yu G, Smith DK, Zhu H, Guan Y, Lam TT-Y. GGTREE: an R package for  
719 visualization and annotation of phylogenetic trees with their covariates and other  
720 associated data. *Methods Ecol. Evol.* 2017;8: 28-36.
- 721
- 722 51. Paradis E, Schliep K. ape 5.0: an environment for modern phylogenetics and  
723 evolutionary analyses in R. *Bioinformatics.* 2018;35: 526-528.
- 724
- 725 52. Efron B, Tibshirani RJ. An introduction to the bootstrap. Boca Raton, FL: Chapman  
726 & Hall; 1993.
- 727
- 728 53. Garcia AAF, Benchimol LL, Barbosa AMM, Geraldi IO, Júnior CLS, Souza AP.  
729 Comparison of RAPD, RFLP, AFLP and SSR markers for diversity studies in  
730 tropical maize inbred lines. *Genet. Mol. Biol.* 2004;27: 579-588.
- 731
- 732 54. Alwala S, Kimbeng CA, Gravois KA, Bischoff KP. TRAP, a new tool for sugarcane  
733 breeding: comparison with AFLP and coefficient of parentage. *J. Am. Soc. Sugar  
734 Cane Technol.* 2006;26: 62-86.
- 735
- 736 55. Suman A, Kimbeng CA, Edmé SJ, Veremis J. Sequence-related amplified  
737 polymorphism (SRAP) markers for assessing genetic relationships and diversity  
738 in sugarcane germplasm collections. *Plant. Genet. Resour.* 2008;6: 222-231.
- 739
- 740 56. Que Y, Chen T, Xu L, Chen R. Genetic diversity among key sugarcane clones  
741 revealed by TRAP markers. *J. Agric. Biotechnol.* 2009;17: 496-503.
- 742

- 743 57. Creste S, Sansoli DM, Tardiani ACS, Silva DN, Gonçalves FK, Fávero TM, et al.  
744 Comparison of AFLP, TRAP and SSRs in the estimation of genetic relationships  
745 in sugarcane. Sugar Tech. 2010;12, 150-154.  
746
- 747 58. Al-Doss AA, Saleh M, Moustafa KA, Elshafei AA, Barakat MN. Grain yield  
748 stability and molecular characterization of durum wheat genotypes under heat  
749 stress conditions. Afr. J.Agric.Res. 2010;5: 3065-3074.  
750
- 751 59. Devarumath RM, Kalwade SB, Bundock P, Elliott FG, Henry R. Independent target  
752 region amplification polymorphism and single-nucleotide polymorphism marker  
753 utility in genetic evaluation of sugarcane genotypes. Plant Breed. 2013;132: 736-  
754 747.  
755
- 756 60. Farsangi FJ, Thorat AS, Devarumath RM. Assessment of the Utility of TRAP and  
757 EST-SSRs Markers for Genetic Diversity Analysis of Sugarcane Genotypes.  
758 Cytol. Genet. 2018;52: 467-477.  
759
- 760 61. Cheavegatti-Gianotto A, de Abreu HMC, Arruda P, Filho JCB, Burnquist WL,  
761 Creste S, et al. Sugarcane (*Saccharum X officinarum*): a reference study for the  
762 regulation of genetically modified cultivars in Brazil. Trop Plant Biol. 2011;4: 62-  
763 89.  
764
- 765 62. de Moraes LK, Aguiar MS, Silva PA, Câmara TMM, Cursi DE, Júnior ARF, et al.  
766 Breeding of sugarcane. In: Cruz VMV, Dierig DA, editors. Industrial crops:  
767 breeding for bioenergy and bioproducts. New York, NY: Springer; 2015. pp. 29-  
768 42.  
769
- 770 63. Garcia A, Mollinari M, Marconi T, Serang OR, Silva R, Vieira M-L, et al. SNP  
771 genotyping allows an in-depth characterisation of the genome of sugarcane and  
772 other complex autopolyploids. Sci Rep. 2013;3: 3399.  
773
- 774 64. Sforça DA, Vautrin S, Cardoso-Silva CB, Mancini MC, Cruz MVR, Pereira GS, et  
775 al. Gene Duplication in the Sugarcane Genome: A Case Study of Allele. Front.  
776 Plant Sci. 2019;10: 553.

777

778 65. Liu P, Chandra A, Que Y, Chen P-H, Grisham MP, White WH, et al. Identification  
779 of quantitative trait loci controlling sucrose content based on an enriched genetic  
780 linkage map of sugarcane (*Saccharum* spp. hybrids) cultivar ‘LCP 85-384’.  
781 *Euphytica*. 2016;207: 527-549.

782

783 66. Glynn NC, McCorkle K, Comstock JC. Diversity among mainland USA sugarcane  
784 cultivars examined by SSR genotyping. *J. Am. Soc. Sugar Cane Technol.*  
785 2009;29: 36-52.

786

787 67. Tazeb A, Haileselassie T, Tesfaye K. Molecular characterization of introduced  
788 sugarcane genotypes in Ethiopia using inter simple sequence repeat (ISSR)  
789 molecular markers. *Afr. J. Biotechnol.* 2017;16: 434-449.

790

791 68. Su W, Wang L, Lei J, Chai S, Liu Y, Yang Y, *et al.* Genome-wide assessment of  
792 population structure and genetic diversity and development of a core germplasm  
793 set for sweet potato based on specific length amplified fragment (SLAF)  
794 sequencing. *PloS One*, 2017;12: e0172066.

795

796 69. Eltaher S, Sallam A, Balemkar V, Emara HA, Nower AA, Salem KFM, et al.  
797 Genetic diversity and population structure of F3: 6 Nebraska winter wheat  
798 genotypes using genotyping-by-sequencing. *Front. Genet.* 2018;9: 76.

799

800 70. Seyoum M, Du XM, He SP, Jia YH, Pan Z, Sun JL. Analysis of genetic diversity  
801 and population structure in upland cotton (*Gossypium hirsutum* L.) germplasm  
802 using simple sequence repeats. *J. Genet.* 2018;97: 513-522.

803

804 71. Meirmans PG, Liu S. Analysis of Molecular Variance (AMOVA) for  
805 autopolyploids. *Front. Ecol. Evol.* 2018;6: 66.

806

807 72. Meirmans PG, Liu S, van Tienderen PH. The analysis of polyploid genetic data. *J.*  
808 *Hered.* 2018;109: 283-296.

809

- 810 73. Junior CADK, Manechini JRV, Corrêa RX, Pinto ACR, Costa JB, Favero TM, Pinto  
811 LR. genetic structure analysis in sugarcane (*saccharum* spp.) using target region  
812 amplification polymorphism (TRAP) markers based on sugar- and lignin-related  
813 genes and potential application in core collection development. Sugar Tech. 2020.  
814 <https://doi.org/10.1007/s12355-019-00791-0>.
- 815
- 816 74. Dal-Bianco M, Carneiro MS, Hotta CT, Chapola RG, Hoffmann HP, Garcia AA, et  
817 al. Sugarcane improvement: how far can we go? Curr Opin Biotechnol. 2012;23:  
818 265-270.
- 819
- 820 75. Park JW, Solís-Gracia N, Trevino C, Da Silva JA. Exploitation of conserved intron  
821 scanning as a tool for molecular marker development in the *Saccharum* complex.  
822 Mol. Breed. 2011;17.
- 823
- 824 76. Thirugnanasambandam PP, Mason PJ, Hoang NV, Furtado A, Botha FC, Henry RJ.  
825 Analysis of the diversity and tissue specificity of sucrose synthase genes in the  
826 long read transcriptome of sugarcane. BMC Plant Biol. 2019;19: 160.
- 827
- 828 77. Daniels J, Smith P, Paton N, Williams CA. The origin of the genus *Saccharum*.  
829 Sugarcane breeding newsletter. 1975;36: 24-39.
- 830
- 831 78. Cai Q, Aitken KS, Fan YH, Piperidis G, Jackson P, McIntyre CL. A preliminary  
832 assessment of the genetic relationship between *Erianthus rockii* and the  
833 “*Saccharum complex*” using microsatellite (SSR) and AFLP markers. Plant. Sci.  
834 2005;169: 976-984.
- 835
- 836 79. Selvi A, Nair NV, Noyer JL, Singh NK, Balasundaram N, Bansal KC, et al. AFLP  
837 analysis of the phenetic organization and genetic diversity in the sugarcane  
838 complex, *Saccharum* and *Erianthus*. Genet. Resour. Crop Evol. 2006;53: 831-  
839 842.
- 840
- 841 80. Raj P, Selvi A, Prathima PT, Nair NV. Analysis of Genetic Diversity of *Saccharum*  
842 Complex Using Chloroplast Microsatellite Markers. Sugar Tech. 2016;18: 141-  
843 148.

844  
845  
846  
847  
848  
849  
850  
851  
852  
853  
854  
855  
856  
857  
858  
859  
860  
861  
862  
863  
864  
865  
866  
867  
868  
869  
870  
871  
872  
873  
874  
875  
876  
877

81. Nayak SN, Song J, Villa A, Bhuvan P, Ayala-Silva T, Yang X, et al. Promoting utilization of *Saccharum* spp. genetic resources through genetic diversity analysis and core collection construction. *PloS One*. 2014;9: e110856.
82. Chen JW, Lao F-y, Chen X-w, Deng H-h, Liu R, He H-y, et al. DNA marker transmission and linkage analysis in populations derived from a sugarcane (*Saccharum* spp.) x *Erianthus arundinaceus* hybrid. *PloS One*. 2015;10: e0128865.
83. Yang S, Zeng K, Wu J, Wang Q, Li X, Deng Z, et al. Chromosome transmission in BC 4 progenies of intergeneric hybrids between *Saccharum* spp. and *Erianthus arundinaceus* (Retz.) Jeswiet. *Sci. Rep.* 2019;9: 2528.
84. Lu YH, D'Hont A, Walker DIT, Rao PS, Feldmann P, Glaszmann JC, et al. Relationships among ancestral species of sugarcane revealed with RFLP using single copy maize nuclear probes. *Euphytica*. 1994;78: 7-18.
85. Metcalfe CJ, Oliveira SG, Gaiarsa JW, Aitken KS, Carneiro MS, Barreto FZ, et al. Using quantitative PCR with retrotransposon-based insertion polymorphisms as markers in sugarcane. *J. Exp. Bot.* 2015;66: 4239-4250.
86. Yang X, Luo Z, Todd J, Sood S, Wang J. Genome-wide association study of multiple yield components in a diversity panel of polyploid sugarcane (*Saccharum* spp.). *bioRxiv*. 2018;387001.
87. Falush D, Stephens M, Pritchard JK. Inference of population structure using multilocus genotype data: dominant markers and null alleles. *Mol. Ecol. Notes*. 2007;7: 574-578.
88. Racedo J, Gutierrez L, Perera MF, Ostengo S, Pardo EM, Cuenya MI, et al. Genome-wide association mapping of quantitative traits in a breeding population of sugarcane. *BMC Plant Biol.* 2016;16: 142.



878 89. Aitken KS, Li JC, Jackson P, Piperidis G, McIntyre CL. AFLP analysis of genetic  
879 diversity within *Saccharum officinarum* and comparison with sugarcane cultivars.  
880 Aust. J. Agric. Res. 2006;57: 1167-1184.

881

## 882 **Supporting information**

883 **S1 Table. Brazilian Panel of Sugarcane Genotypes (BPSG): accessions, pedigree**  
884 **information, origin and predefined groups of the 254 accessions.**

885 **S2 Table. Names, sequences 5' – 3', genbank ID and the references of the fixed and**  
886 **arbitrary primers that compose TRAP markers.**

887 **S3 Table. Functional description of the sequences that gave rise to fixed primers of**  
888 **TRAP markers used in this study.**

889 **S4 Table. TRAP genotyping information.** Total number of fragments, number of  
890 polymorphic fragments, percentage of polymorphism, polymorphism information  
891 content (PIC) value and discriminatory power (DP) value for each of the eight TRAP  
892 markers evaluated in the Brazilian Panel of Sugarcane Genotypes (BPSG).

893 **S5 Table. Putative exclusive TRAP fragments observed in the Brazilian Panel of**  
894 **Sugarcane Genotypes (BPSG).**

895 **S1 Fig. Best k analysis showing k values from 2 to 9 (10 suppressed).**

896 **S2 Fig. Bootstrap analysis of TRAP genotyping.** Boxplots of the coefficients of  
897 variation (CV%), associated with the estimates of genetic dissimilarities, by bootstrap  
898 analysis for subsamples with different numbers of TRAP fragments.

899

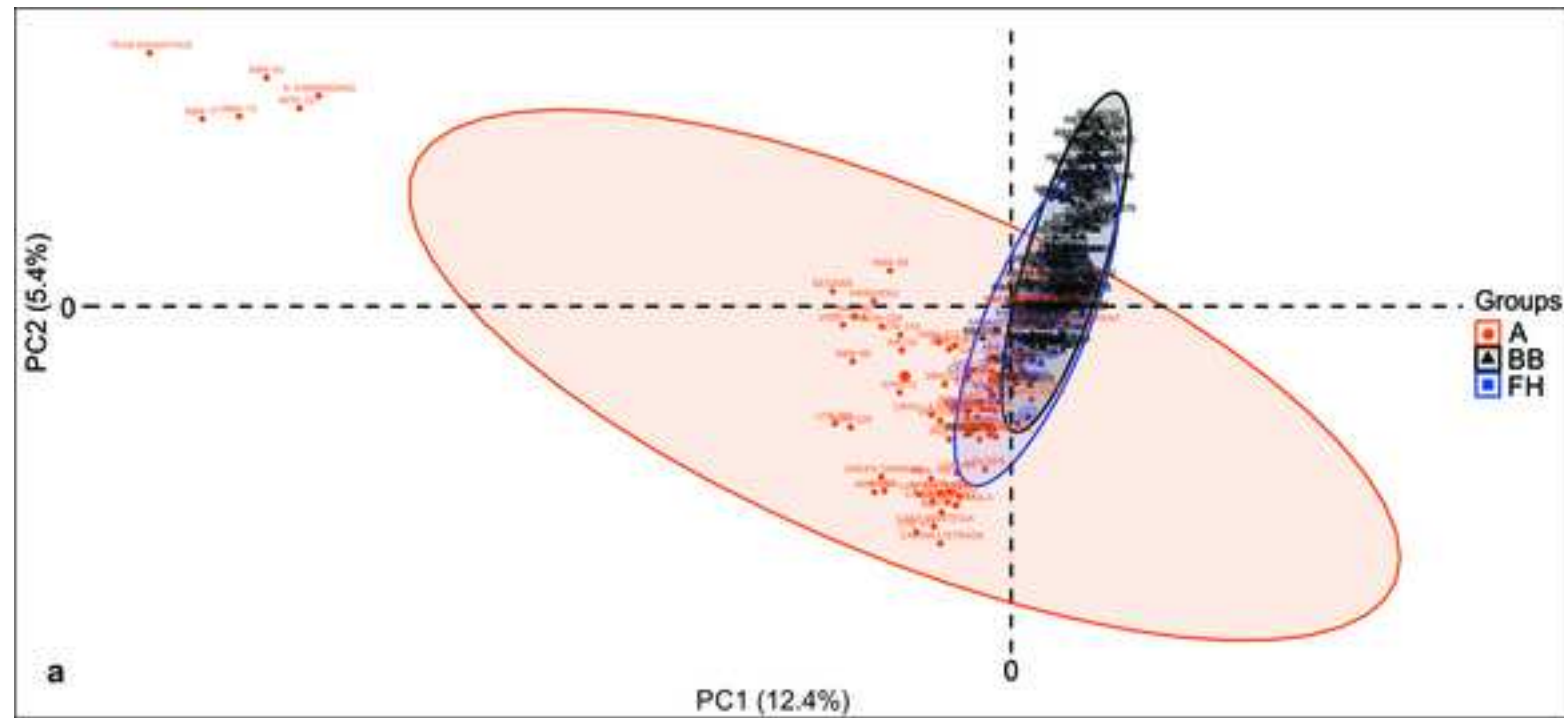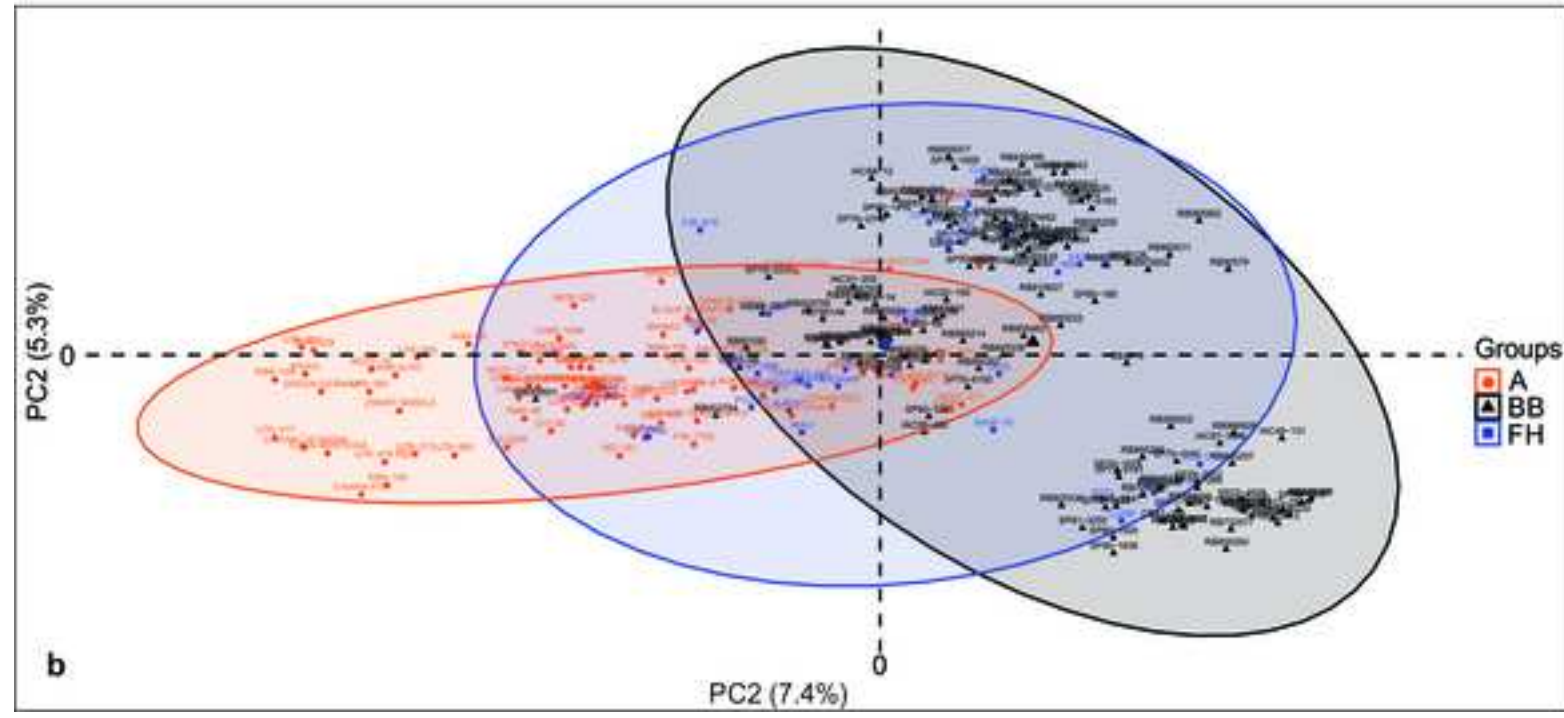



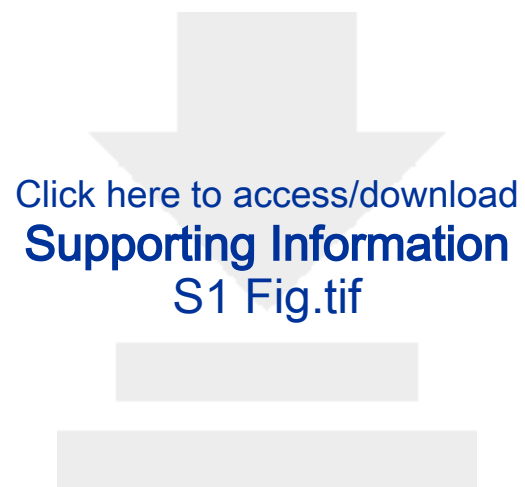

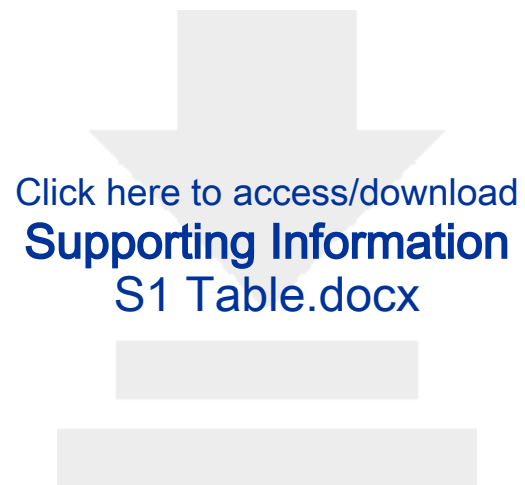

Click here to access/download  
**Supporting Information**  
S1 Table.docx

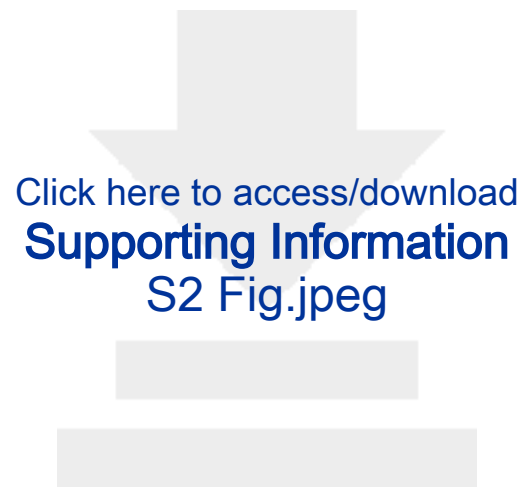

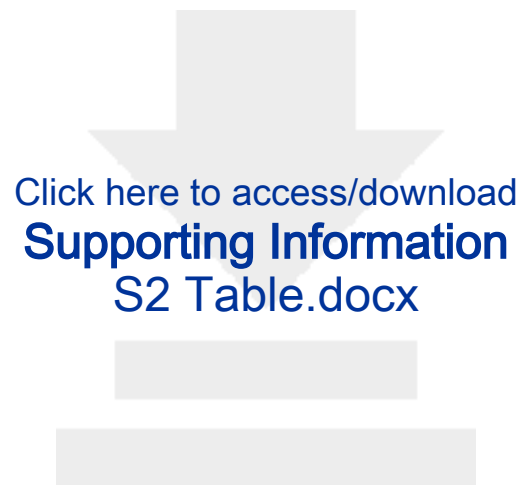

Click here to access/download  
**Supporting Information**  
S2 Table.docx

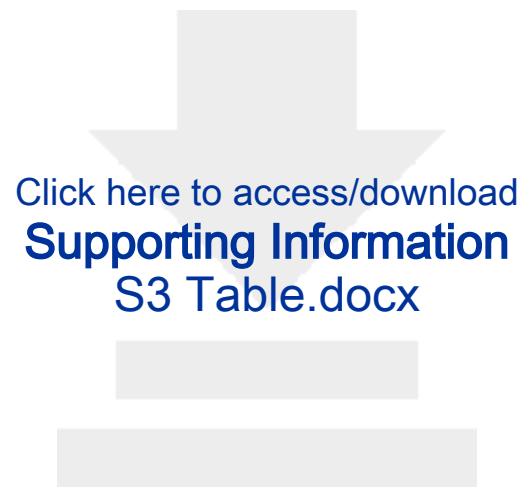

Click here to access/download  
**Supporting Information**  
S3 Table.docx



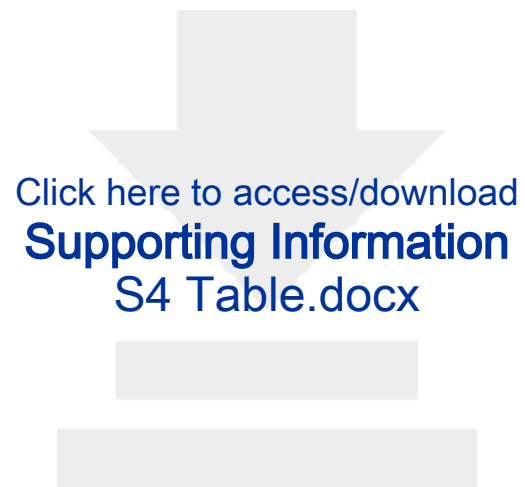

Click here to access/download  
**Supporting Information**  
S4 Table.docx

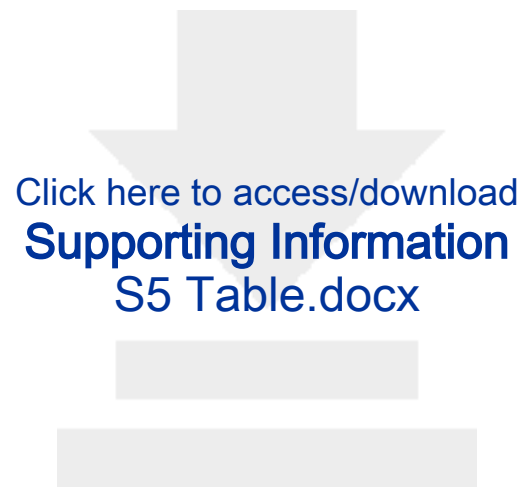

Click here to access/download  
**Supporting Information**  
S5 Table.docx
